# Supplementary material for: Handwashing Message Type Predicts Behavioral Intentions in the United States at the Beginning of the Global COVID-19 Pandemic
Source: Front Public Health. 2021 May 5;9:583491. doi: 10.3389/fpubh.2021.583491 (PMC8131518; doi:10.3389/fpubh.2021.583491)
Supplement: Supplementary file 1 [file Data_Sheet_1.csv]

Condition	HW_Att1	SD_Att1	FT_Att1	SH_Att1	VC_Att1	HW_Att2	SD_Att2	FT_Att2	SH_Att2	VC_Att2	Emotions_1	Emotions_2	Emotions_3	Emotions_4	Emotions_5	HW_Intentions_1	HW_Intentions_2	HW_Intentions_3	HW_Intentions_4	HW_Intentions_5	HW_Intentions_6	TTM_Hands	TTM_SocDist	TTM_FaceTouch	TTM_StayHome	TTM_Vampire	HW_Dislike	HWCV	HWN	CleaningProducts_1	CleaningProducts_2	CleaningProducts_3	CleaningProducts_4	CleaningProducts_5	CleaningProducts_6	CleaningProducts_7	CleaningProducts_8	CleaningProducts_9	CleaningProducts_10	CleaningProducts_10_TEXT	HealthProducts_1	HealthProducts_2	HealthProducts_3	HealthProducts_4	HealthProducts_5	HealthProducts_6	HealthProducts_7	HealthProducts_8	HealthProducts_9
1	7	7	7	7	6	7	7	6	7	6	5	4	3	5	5	3	5	3	5	2	3	7	6	5	7	7	1	15	8
1	5	6	6	7	7	7	4	4	7	7	3	2	2	1	2	4	5	2	5	5	4	6	6	6	7	6	4	9-15	4-5		1	1	1			1	1		1
1	6	6	6	6	6	6	6	6	6	6	3	5	4	4	6	3	4	4	4	4	3	6	6	6	5	7	2	3	2
1	5	6	6	6	6	6	7	6	7	7	5	4	7	6	5	5	5	5	5	5	5	7	6	7	7	7	1	15	10													1
1	7	7	7	7	7	7	7	7	7	7	6	2	6	5	6	4	5	5	5	5	4	6	6	5	7	5	3	6-8	2-3	1	1	1	1			1					1			1
1	7	5	5	3	6	7	5	6	7	6	5	6	7	7	7	5	5	5	5	5	5	7	6	7	7	7	2	8	8							1					1
1	7	7	7	7	7	7	7	6	6	6	5	4	2	5	6	2	4	4	4	2	3	6	6	6	7	7	1	5	5	1	1	1				1
1	7	6	6	7	5	7	6	6	7	5	7	6	5	6	7	1	2	2	2	3	4	6	6	6	7	7	2	5	4				1	1		1
1	7	7	7	7	5	7	7	7	7	6	7	5	7	7	6	5	5	5	5	4	5	7	6	6	7	7	1	20	10		1	1				1	1					1	1	1	1			1
1	7	6	6	6	6	7	7	7	7	7	6	4	7	6	5	5	5	5	5	5	5	6	6	6	5	7	2	30	8		1	1			1
1	7	7	6	7	5	7	7	6	7	5	5	5	5	6	5	2	4	4	3	2	3	6	5	4	7	7	2	5	3
1	6	6	6	6	5	6	6	6	7	6	4	5	6	7	6	4	5	5	5	3	4	6	6	6	7	7	2	12	6
1	7	7	6	6	7	7	7	7	6	7	4	3	2	5	6	4	5	5	5	3	4	7	7	6	5	6	3	5	3	1	1	1		1		1					1	1	1	1
1	6	5	6	7	7	6	5	6	7	7	6	3	3	6	4	3	4	4	5	5	3	6	6	5	7	7	2	15	10
1	7	7	7	7	6	7	7	7	7	7	7	7	7	7	7	5	5	5	5	5	5	6	6	6	6	6	1	25	10		1	1	1			1
1	7	7	7	7	7	7	7	7	7	7	6	5	6	6	6	5	5	5	5	5	5	6	6	6	7	7	2	15	7		1	1	1		1	1							1
1	7	7	7	7	7	7	7	7	7	7	4	4	7	4	7	5	5	5	5	5	5	6	6	6	6	7	1	7	2		1	1	1		1	1					1	1		1
1	7	7	6	6	6	7	7	6	6	6	6	4	6	6	5	5	4	5	5	5	5	6	6	5	6	7	3	12	4		1	1										1	1
1	7	7	7	7	7	7	7	7	7	7	5	4	7	7	7	2	5	5	5	5	5	1	1	1	1	1	1	10	5			1
1	7	6	5	2	5	7	7	7	7	7	7	7	7	7	4	4	5	5	5	4	5						1	8	3			1		1		1						1
1	7	7	7	7	7	7	7	7	7	7	5	4	4	5	6	4	5	5	5	4	4	6		5	6	6	2	6	3		1	1	1			1	1		1	alcohol	1	1	1
1	6	6	6	6	5	7	7	7	7	7	6	4	6	7	5	5	5	5	5	5	5	7	6	6	6	7	2	20	12
1	7	7	7	7	7	7	7	7	7	7	5	4	6	5	4	5	5	5	5	5	4	6	6	6	6	6	1	12	8		1
1	6	2	6	6	6	7	1	7	7	7	2	2	5	2	7	5	5	5	5	1	5	7	1	6	5	6	1	5	2							1
1	6	6	5	6	5	6	6	6	6	6	5	2	6	6	4	4	5	5	5	3	4	6	6	6	7	7	2	4	1						1
1	7	7	7	7	7	7	7	7	7	7	6	3	5	6	7	2	5	5	5	2	5	4	7	1	7	7	5	5	1	1	1	1										1
2	7	7	7	7	7	7	7	7	7	7	6	4	7	7	6	4	5	5	5	5	4	7	6	6	7	7	1	7	4	1	1	1				1						1
2	7	7	7	7	7	7	7	7	7	7	6	5	6	6	7	4	5	5	5	5	4	6	6	6	7	7	2	8	5	1		1									1			1
2	6	6	5	7	4	7	6	5	7	5	7	4	5	6	5	4	4	4	5	5	4	6	6	5	6	5	2	12	8
2	7	7	7	7	7	7	7	7	7	7	5	6	6	6	7	5	5	5	5	5	4	6	6	6	6	6	2	6	3							1										1
2	7	6	4	6	5	7	6	4	6	6	5	5	5	6	6	4	5	5	5	4	5	7	6	4	6	6	2	10	5	1	1	1				1					1	1	1	1		1
2	7	7	7	7	7	7	7	7	7	7	6	6	6	5	6	5	5	5	5	5	5	6	7	5	6	7	1	15	2	1	1				1	1					1	1		1
2	5	6	5	7	6	6	6	6	7	6	5	4	5	5	5	5	5	4	5	4	5	7	6	5	6	7	2	4	4	1	1	1	1		1	1					1	1			1
2	6	7	7	6	5	7	7	7	7	6	6	6	7	6	6	5	5	5	5	3	2	5	7	6	7	7	2	20	10		1										1		1
2	7	7	7	7	5	6	5	5	7	7	7	2	3	7	3	4	5	5	5	3	4	6	5	6	7	7	1	20	10		1	1				1								1			1
2	7	7	7	7	7	7	7	7	7	7	6	7	6	6	7	4	5	5	5	4	5	7	6	6	7	6	1	5	5			1				1
2	7	7	7	6	7	7	7	7	7	7	6	6	7	6	5	3	4	4	5	5	5	6	6	6	7	7	2	7	4	1	1					1					1	1
2	6	6	6	6	6	7	7	7	7	7	7	4	7	7	6	5	5	5	5	5	5	7	7	7	7	7	1	30	15	1	1	1					1				1		1
2	6	6	7	7	5	7	7	7	7	6	6	4	6	6	5	5	5	5	5	5	5	7	6	6	5	7	2	5	3		1					1
2	6	6	6	7	6	7	7	7	7	7	1	6	1	1	6	5	5	5	5	5	5	6	6	6	6	6	2	20	5				1			1					1			1
2	7	7	7	7	7	7	7	7	7	7	5	5	5	5	5	5	5	5	5	5	5	6	6	6	7	6	2	3	0			1	1											1
2	6	6	6	6	6	6	6	6	6	6	1	6	6	4	6	4	4	4	4	4	4	7	6	6	6	6	1	10	4		1	1	1	1	1	1	1				1			1		1
2	6	6	6	6	7	7	7	7	7	7	7	6	7	7	6	5	5	5	5	4	4	7	6	6	5	7	2	10	4	1	1	1	1		1	1								1
3	6	6	3	7	7	6	7	4	7	7	4	4	2	2	3	1	2	1	4	2	1	1	6	1	5	6	4	0	0
3	7	7	7	7	7	7	7	7	7	7	7	7	7	7	7	5	5	5	5	5	5	7	6	6	7	7	1	10	4	1	1	1				1					1	1	1
3	6	6	6	6	5	7	7	6	7	6	6	4	5	6	4	4	5	5	5	5	4	7	6	6	7	6	2	30	10		1	1				1
3	6	6	6	6	7	7	7	6	7	7	7	6	7	7	5	3	4	4	5	3	4	7	6	5	5	7	2	8	5
3	7	7	7	7	7	7	7	7	7	7	5	4	5	5	4	4	5	5	5	5	5	6	6	6	5	7	4	6	2		1	1				1					1
3	7	7	6	7	7	7	7	7	7	7	5	5	6	5	4	5	5	5	5	5	5	7	6	6	7	7	2	10	8			1				1
3	6	6	6	6	6	7	7	7	7	7	6	6	6	6	6	5	5	5	5	5	5	6	6	6	6	5	2	5	3					1		1
3	7	7	7	7	5	7	7	7	7	7	7	7	7	7	7	2	5	5	5	3	2	4	6	5	5	5	1	15	10		1	1			1	1
3	6	6	7	7	6	7	6	6	7	6	6	6	6	6	7	5	5	5	5	5	5	6	6	6	5	6	1	30	10			1				1							1	1	1	1		1
3	6	7	3	7	4	6	1	5	6	6	4	2	5	4	4	2	3	3	5	2	2	5	6	5	7	7	2	8	5		1	1	1		1	1
3	6	2	5	3	5	6	2	4	5	4	2	2	2	2	4	4	3	2	4	4	1	6	1	5	7	7	2	3	2
3	7	7	7	7	7	7	7	7	7	7	6	6	7	7	7	3	5	5	5	5	5	7	6	6	7	7	3	15	9			1	1			1
3	6	5	5	5	5	6	6	5	7	4	3	4	3	2	4	5	4	4	3	3	3	6	6	7	6	7	1	7	3	1			1				1							1		1	1
4	7	7	7	7	7	7	7	7	7	7	7	7	7	7	6	5	5	5	5	5	5	6	6	6	6	7	1	5	2		1	1	1			1					1	1		1
4	7	7	7	7	7	7	7	7	7	7	7	6	6	7	5	4	5	5	5	5	5	6	6	6	7	7	1	10	5							1	1
4	5	5	5	5	5	6	6	5	6	5	5	4	6	6	2	2	5	5	5	3	3	6	6	6	5	6	1	12	5		1	1	1	1	1									1
4	6	6	6	6	6	7	7	7	7	7	6	6	6	6	6	5	5	5	5	5	5	6	6	6	6	6	2	15	4	1	1	1	1			1					1	1
4	5	7	4	5	4	6	7	5	7	4	4	4	4	3	3	2	3	2	4	4	5	6	7	4	7	7	2	2	2		1	1				1
4	7	7	7	7	6	7	7	7	7	6	3	3	7	5	5	4	5	5	5	5	4	6	5	6	7	5	4	10	5	1	1	1	1			1						1		1
4	6	5	6	6	6	6	6	6	7	6	4	4	3	4	2	4	5	5	5	4	4	6	6	6	6	7	3	3	5
4	7	7	6	7	7	7	7	6	7	7	4	6	7	4	5	3	5	5	5	5	4	5	6	5	6	7	7	1	2
4	6	6	4	7	7	7	7	7	7	7	6	6	5	6	6	5	5	5	5	5	3	6	4	6	5	6	2	10	5			1	1			1
4	6	7	5	7	6	7	7	7	7	7	5	6	5	5	6	4	5	5	5	4	3	6	6	6	6	6	3	5	3	1	1		1	1	1	1						1		1
4	7	7	7	7	6	7	7	7	7	6	6	6	7	7	6	4	5	5	5	4	4	6	6	6	5	6	2	6	3		1	1	1			1						1	1
4	7	6	7	7	6	7	7	7	7	7	6	4	6	7	6	3	5	4	5	5	3	6	6	6	7	7	3	10	5	1	1	1	1			1					1	1	1
4	5	6	5	7	5	7	7	7	7	6	7	4	6	7	4	5	5	5	5	5	5	7	6	6	5	6	5	12	8		1	1			1		1					1
4	7	7	6	6	6	7	7	7	7	7	7	6	7	7	5	5	5	4	5	4	4	6	6	6	5	7	2	8	3							1						1
4	7	6	5	6	7	7	7	5	7	6	3	5	6	6	5	3	5	4	5	4	5	6	6	5	5	7	5	10	5		1	1				1							1
4	6	7	5	5	3	7	6	5	6	4	6	6	5	6	6	5	5	3	5	3	4	6	6	5	6	5	2	7	4		1					1					1					1		1
4	7	6	7	6	7	7	6	6	6	6	6	6	6	6	6	4	5	4	3	4	5	6	5	7	4	5	1	10	3							1											1
4	6	5	4	6	5	7	6	6	4	7	3	2	2	3	4	4	4	5	4	4	5	6	7	6	6	7	1	10	3							1										1		1	1
4	6	6	6	6	6	7	7	6	7	5	6	4	5	6	5	5	5	5	5	5	5	7	6	5	7	7	2	15+	10+		1		1			1								1
4	7	7	7	7	7	7	7	7	7	7	6	4	7	6	6	5	5	5	5	4	5	6	6	6	5	6	1	20	6		1				1						1	1	1			1
4	7	7	7	7	6	7	7	7	7	7	7	6	6	7	7	5	5	5	5	5	5	6	6	6	6	6	1	10	3		1	1	1			1
4	7	7	6	7	7	6	6	6	6	6	2	2	2	2	2	1	1	4	5	2	4	4	6	6	6	7	6	0 lol	0 lol
4	6	7	6	7	7	7	7	6	7	7	6	6	5	6	5	3	5	4	5	3	3	6	6	5	5	6	2	5	2			1				1
5	3	5	4	4	5	4	5	4	5	6	4	3	4	5	4	2	3	4	3	3	2	5	4	5	6	5	4	10	5	1	1			1		1											1
5	6	6	6	6	6	6	6	6	6	6	4	4	6	5	4	3	5	4	5	4	3	5	6	5	5	5	5	15	10														1
5	5	7	5	7	7	5	7	5	7	7	6	4	4	6	4	2	3	3	5	3	3	5	6	5	5	7	6	4	4		1	1				1
5	7	7	7	7	6	7	7	7	7	7	6	4	7	6	5	5	5	5	5	4	5	6	6	6	5	6	2	15	5			1	1			1
5	7	7	7	7	7	7	7	7	7	7	1	1	1	3	5	3	5	3	5	4	5	6	6	6	6	6	1	5	2		1	1	1			1								1
5	7	7	5	7	5	7	7	6	7	5	7	3	7	7	5	5	5	3	5	4	5	7	5	6	7	4	1	5	2							1
5	6	7	7	6	7	7	7	7	7	6	5	6	7	7	6	5	5	5	5	4	4	6	6	6	6	6	1	20	10		1	1	1		1
5	7	7	7	7	7	7	7	7	7	7	5	5	6	5	6	4	5	5	5	4	4	6	6	6	6	6	2	10	3		1	1			1	1						1
5	7	7	7	7	6	7	7	7	7	7	7	7	7	7	5	5	5	5	5	5	5	7	6	6	6	7	2	25	15		1	1				1					1	1		1
5	7	7	7	7	7	7	7	7	7	7	4	4	6	7	7	4	5	5	5	4	5	6	6	6	5	7	2	5	2	1						1			1	Alcohol	1
5	5	6	7	6	6	5	7	6	6	7	5	6	7	7	6	4	4	5	3	5	5	7	6	5	6	7	6	Very good	I like this .		1		1	1		1	1							1	1				1
5	7	6	6	7	4	7	5	6	7	4	4	6	6	5	7	3	3	4	5	4	5	6	5	6	6	7	1	20	10			1		1		1					1		1
5	7	6	6	7	5	7	7	7	7	5	7	7	7	7	6	3	4	4	4	3	4	7	6	6	5	7	2	12	10
5	7	7	7	7	6	7	6	5	7	7	7	6	6	7	3	5	4	4	5	4	4	6	6	5	5	5	1	6	4	1	1	1	1
	6	6	5	7	7	7	7	6	7	7	6	4	4	5	6	5	4	5	5	5	4	6	6	6	7	6	1	15	6	1	1	1	1		1	1					1	1
1	5	4	5	3	3	5	4	4	6	6	5	4	3	5	5	4	2	2	5	4	4	6	6	7	5	6	2	4	2	1	1		1			1							1	1	1
1	7	7	7	7	7	7	7	7	7	7	6	7	6	6	6	5	5	5	5	5	5	6	6	6	5	6	1	10	1
1	7	7	7	7	7	7	7	7	7	7	7	4	7	7	5	5	5	5	5	5	5	6	6	6	7	6	5	7	5								1				1
1	7	7	7	7	7	7	7	7	7	7	6	4	7	6	5	5	5	5	5	4	5						1	40	20	1	1	1	1			1					1	1
1	6	7	6	7	5	7	7	7	7	7	7	6	7	7	6	5	5	5	5	5	5	7	6	7	7	7	2	12	5		1	1	1			1					1	1	1				1
1	6	6	7	6	7	7	7	7	7	7	6	4	5	6	3	4	4	4	5	4	3	6	6	5	6	7	2	12	7
1	6	7	6	6	7	7	7	7	7	7	5	6	4	5	4	4	5	4	5	4	3	6	6	6	5	6	2	6	4		1	1				1
1	7	7	7	7	6	7	7	7	7	7	7	6	6	7	6	5	5	5	5		5	6	6	6	6	7	2	15	8		1	1				1
1	7	7	7	7	7	7	7	7	7	7	6	5	3	5	6	3	4	3	4	3	4	6	6	6	7	7	2	About 5 times a day	About 2-3 times a day		1	1	1			1
1	7	7	7	7	7	7	7	7	7	7	6	4	7	7	7	5	5	5	5	5	5	7	6	6	7	7	1	17	15			1	1	1	1	1						1	1	1				1
1	7	7	7	7	7	7	7	7	7	7	6	6	7	6	6	5	5	5	5	5	5	7	6	7	7	7	1	20	12		1	1	1		1	1					1			1
1	7	7	7	7	7	7	7	7	7	7	7	7	7	7	7	5	5	5	5	5	5	7	6	7	7	7	2	20	10	1	1	1	1	1	1	1		1					1	1		1	1	1
1	7	7	7	7	7	7	7	7	7	7	6	6	7	6	7	4	5	4	5	5	5	6	6	6	7	7	6	5	3							1
1	7	7	7	7	7	7	7	7	7	7	6	7	7	7	7	5	5	5	5	5	5	6	6	6	7	7	1	5	3						1
1	7	6	3	7	5	6	7	5	7	6	6	4	5	6	4	2	3	2	5	2	2	5	5	4	7	6	3	6	3
1	5	6	4	7	6	7	7	7	7	7	7	7	7	7	7	4	2	2	5	5	3	6	6	5	6	5	1	7-10	3-4	1	1	1			1				1	alcohol, peroxide			1	1
1	7	7	7	7	7	7	7	7	7	7	6	6	6	6	5	5	5	5	5	5	5	7	6	6	5	7	1	5-10, If i go out of the house that number increases tremendously.	5-10
1	7	7	7	7	7	7	7	7	7	7	4	6	7	5	5	5	5	5	5	5	5	6	6	6	6	6	2	15	6
1	6	6	6	7	5	7	7	6	7	6	6	6	6	6	5												1	5-10	5-10													1				1
1	7	6	6	6	5	7	6	6	6	5	4	1	1	2	5	4	5	4	5	5	4	7	6	6	7	6	2	20	15
1	7	6	6	6	6	7	7	6	7	7	4	1	2	4	6	3	4	2	5	4	4	6	6	5	5	7	2	6	4
1	7	7	7	7	7	7	7	7	7	7	7	7	7	7	5	5	5	5	5	5	5	7	6	6	6	7	4	8	5		1	1	1								1	1
1	6	6	5	6	6	6	7	5	7	6	6	5	6	7	6	4	5	5	5	4	4	7	6	6	6	7	2	10	7		1	1
2	7	7	7	7	7	7	7	7	7	7	6	6	6	6	6	5	5	5	5	5	5	6	6	6	7	7	2	6	2	1	1	1	1	1		1					1	1
2	6	6	6	6	6	6	6	6	6	6	6	6	6	6	5	5	5	5	5	5	5	6	6	6	5	6	1	20	10		1	1	1		1	1					1	1	1			1
2	7	7	7	7	7	7	7	7	7	7	7	7	7	7	6	5	5	5	5	5	5	7	6	5	6	7	1	15	12	1	1	1	1		1	1					1			1
2	7	7	7	7	7	7	7	7	7	7	7	7	7	6	6	4	5	5	5	4	5	7	6	6	7	7	1	10	6		1						1
2	7	7	7	7	7	7	7	6	7	6	6	4	6	6	6	4	5	4	4	4	5	6	6	6	6	7	2	10	6		1						1				1
2	6	7	7	7	5	7	7	7	7	7	6	1	5	7	5	5	5	5	5	4	5	6	6	6	6	6	1	12	6	1	1					1
2	7	7	7	7	7	7	7	7	7	7	6	6	7	6	7	5	5	5	5	4	5	7	7	6	6	7	2	10	6							1
2	7	7	7	7	7	7	7	7	7	7	5	6	7	7	6	4	5	5	5	5	5	7	6	6	7	7	2	30	20	1	1	1	1			1					1	1						1
2	6	6	6	7	7	7	7	7	7	7	5	6	6	6	6	4	5	5	5	4	5	6	6	5	7	7	3	5	2		1	1	1			1
2	7	7	7	7	7	7	7	6	7	7	5	3	5	6	6	3	5	4	5	3	5	6	6	5	7	7	3	6	1							1
2	7	7	7	7	5	7	7	7	7	6	6	6	7	6	7	4	5	5	5	4	4	6	6	6	7	7	2	10	5	1	1	1				1					1	1	1			1
2	7	7	7	7	6	7	7	7	7	7	7	6	6	6	5	4	5	4	5	5	5	6	6	6	7	7	1	15	4	1		1				1					1	1	1
2	7	6	6	7	6	7	6	6	7	6	6	6	6	6	6	4	4	4	5	4	4	6	7	6	5	5	6	6	3							1
2	6	6	6	6	6	6	6	6	6	6	7	6	7	7	7	4	3	4	5	4	4	7	6	6	6	7	5	18	15	1	1	1	1	1	1	1	1					1		1					1
2	7	7	7	7	7	7	7	7	7	7	7	5	5	7	7	5	5	5	5	5	4	6	6	6	6	7	5	6	4															1
2	7	7	7	7	7	7	7	7	7	7	6	7	7	7	7	5	5	5	5	5	5	7	6	6	7	7	1	15 - 20	5 - 10		1	1	1			1					1	1	1
2	7	7	7	7	7	7	7	7	7	7	7	5	7	7	5	5	5	5	5	5	5	7	6	6	5	6	1	12	6	1	1	1				1						1	1
2	7	7	7	7	7	7	7	7	7	7	5	6	7	6	7	5	5	5	5	5	5	7	6	7	7	7	1	10	5	1	1	1	1			1	1					1
2	7	7	7	7	7	7	7	7	7	7	6	7	7	6	7	5	5	5	5	5	5	6	6	6	6	6	1	10	4		1	1
2	7	7	7	7	7	7	7	7	7	7	5	4	5	6	5	4	5	4	5	4	5	7	6	6	7	7	4	6	6		1	1
2	7	7	7	6	6	7	6	7	7	6	7	7	6	7	6	4	3	4	5	3	5	6	5	6	7	5	5	6	4				1									1			1
2	6	6	5	7	6	7	7	7	7	7	7	6	6	7	7	5	5	5	5	5	5	7	6	6	7	7	1	20	10		1	1	1			1
3	6	6	6	7	6	7	7	6	7	6	5	4	6	5	3	3	5	5	5	5	3	6	6	6	7	7	3	10	8														1
3	7	6	5	7	5	7	7	6	7	6	5	4	7	6	5	4	5	5	5	5	5	7	6	6	7	7	1	40	20		1	1				1					1	1
3	7	7	7	7	7	7	7	7	7	7	6	6	6	6	6	5	5	5	5	4	5	7	6	6	6	7	2	7	4			1	1			1						1	1
3	7	7	7	7	6	7	7	6	6	6	6	6	7	6	7	5	5	5	5	4	4	6	6	6	6	6	5	20	8	1	1	1				1
3	7	7	7	7	6	7	7	7	7	7	6	6	5	6	6	4	5	5	5	4	5	6	6	6	7	7	3	6	4							1					1	1
3	5	5	5	7	5	6	6	6	7	6	1	5	5	1	5	2	4	4	5	4	4	6	6	4	6	7	6	5	0		1
3	7	7	7	7	6	7	7	7	7	7	6	4	6	5	5	5	5	5	5	5	4	7	6	6	7	7	5	10	5	1	1	1					1						1
3	7	7	7	7	7	7	7	5	7	7	6	6	6	6	6	2	5	5	5	2	5	6	6	5	7	7	2	10	5
3	7	6	6	7	7	7	6	6	7	7	5	7	7	7	7	3	3	3	5	3	4	7	6	4	7	7	1	5	5
3	7	7	7	7	7	7	7	7	7	7	6	5	7	7	7	3	5	5	5	5	5	7	6	6	7	7	3	15	10												1		1
3	7	6	7	6	6	7	6	7	7	6	5	6	6	6	6	5	4	4	5	4	5	7	6	5	5	7	2	12	8					1		1		1			1			1			1	1
3	7	7	6	7	6	7	7	7	7	7	6	4	6	6	5	4	5	5	5	4	5	6	6	5	6	6	2	6	3		1	1							1	thermometer
3	7	7	7	7	7	7	7	7	7	7	7	4	5	7	5	5	5	5	5	5	5	7	7	6	5	7	1	8	8
3	6	6	6	6	5	7	7	6	7	7	6	4	6	7	6	4	5	5	5	5	5	7	6	6	7	7	1	30	20		1	1				1
3	7	7	7	7	6	7	7	7	7	7	6	6	7	6	7	4	5	5	5	4	5	6	6	6	6	7	3	5	8								1						1
3	7	7	7	7	7	7	7	7	7	7	7	5	6	7	7	3	4	4	5	4	4	6	6	5	5	7	7	7	5	1	1	1				1							1
3	7	7	7	7	7	7	7	7	7	7	7	6	7	7	5	5	5	5	5	5	5	6	6	6	7	6	1	30	10	1	1	1																1
3	7	7	7	7	7	7	7	7	7	7	7	4	4	7	4	3	5	5	3	3	3	6	6	6	6	6	4	2	0		1											1
3	7	7	7	7	7	7	7	7	7	7	7	6	7	7	6	5	5	5	5	5	5	7	6	6	7	7	1	25	12	1	1	1	1				1						1	1					1
3	7	7	6	7	6	7	7	5	7	6	6	6	7	6	6	4	5	5	5	3	4	7	7	7	6	6	2	10-15	10		1		1								1
3	7	7	6	7	7	7	7	6	7	7	4	5	7	4	5	5	5	5	5	2	3	5	6	5	7	7	1	10	7	1	1	1	1	1		1
3	6	6	6	6	6	7	7	7	7	7	7	7	7	7	6	5	5	5	5	5	5	7	6	7	5	7	1	100	100	1	1	1	1			1	1	1						1		1	1	1
3	6	5	6	4	5	7	6	7	7	7	2	3	4	2	6	5	4	3	5	5	5	7	7	6	6	7	1	3 or 4	3 or 4							1	1										1	1
3	7	5	6	6	6	7	5	6	7	6	5	4	5	6	7	4	5	5	4	4	5	7	6	6	7	7	1	10	7	1		1				1	1							1
3	7	6	7	7	5	7	6	7	7	6	5	2	7	5	2	2	5	5	5	2	3	7	6	6	7	7	1	10	5		1	1				1					1	1
3	7	6	6	6	6	7	6	7	7	7	7	6	7	7	7	5	5	5	5	5	5	7	6	7	7	7	1	20	15
3	7	7	7	7	6	7	7	7	7	7	7	5	7	7	5	4	5	4	5	4	5	7	6	6	7	7	1	10-15	5-10	1		1				1					1	1		1		1
3	7	7	6	7	5	7	7	7	7	7	6	7	7	7	5	5	5	5	5	5	5	6	6	6	5	5	2	9	4	1	1	1				1					1	1	1	1	1
3	7	7	6	7	6	7	7	7	7	7	5	6	7	6	6	4	4	4	5	4	5	6	6	6	5	6	1	4	2
4	7	7	6	6	7	7	7	7	7	7	6	5	2	6	6	5	5	5	5	4	5	7	6	7	6	7	2	15	10		1	1				1					1					1
4	6	7	5	7	5	6	7	5	7	5	2	1	5	2	2	2	5	5	5	2	4	1	7	4	7	7	3	1	1															1
4	6	6	6	7	3	6	6	6	7	4	4	4	4	4	4	3	4	2	4	3	3	6	6	6	7	4	3	20	10		1	1		1		1
4	6	7	6	7	6	7	7	7	7	7	5	2	6	5	6	5	5	5	5	5	5	7	6	6	7	7	4	10	4		1	1				1						1
4	6	6	6	7	6	7	7	7	7	7	7	4	7	7	6	5	5	5	5	3	4	6	6	6	5	6	2	10	3														1
4	7	7	7	7	7	7	7	7	7	7	6	7	7	7	7	5	5	5	5	5	5	7	7	6	7	7	1	15	10
4	7	7	4	7	7	7	7	5	7	7	4	4	5	7	4	4	5	5	3	2	5	6	6	1	5	4	1	25	16
4	5	6	6	6	5	7	7	7	7	7	7	5	5	7	5	3	5	5	5	4	5	7	6	5	5	7	4	8	5
4	7	7	7	7	6	7	7	7	7	6	6	6	5	5	6	4	5	5	5	4	3	6	6	6	7	7	2	6	3		1	1				1						1
4	7	7	6	7	5	7	7	7	7	5	3	2	7	5	5	4	5	5	5	4	4	7	5	6	5	6	4	10	4	1	1	1	1			1	1				1	1	1	1			1
4	7	7	7	7	7	7	7	7	7	7	5	4	6	5	6	2	5	5	5	2	5	6	6	1	7	7	2	2	2
4	6	6	6	6	6	6	6	6	6	6	6	5	6	6	6	5	5	5	5	4	4	7	6	6	6	7	2	7	4		1	1	1		1	1					1			1
4	6	7	6	6	6	7	7	7	7	7	6	4	6	7	6	5	5	5	5	5	5	7	6	7	7	7	1	25	10		1	1	1			1								1	1	1
4	5	5	5	5	5	5	5	5	5	6	3	4	5	6	5	4	3	3	5	4	4	7	6	6	6	7	2	20	10		1
4	7	6	6	7	4	7	6	6	7	4	2	3	4	4	4	2	2	2	5	5	4	7	6	6	7	7	1	8	8	1	1	1		1	1	1		1				1		1			1	1
4	7	7	7	7	7	7	7	7	7	7	2	4	6	5	7	5	5	5	5	4	3	6	6	6	7	6	5	20	8
4	6	6	6	6	6	7	7	7	7	7	7	7	7	7	6	5	5	5	5	5	5	7	6	6	6	7	1	20	20			1					1				1			1
4	6	7	5	7	7	7	7	6	7	7	7	7	7	6	7	4	3	5	3	3	5	7	7	5	7	7	4	6	4		1	1				1
4	6	7	6	7	6	6	7	6	7	7	4	3	5	4	5	2	5	4	5	3	5	1	6	1	7	7	5	4	1
4	7	7	7	7	7	7	7	7	7	7	7	4	6	5	6	5	5	5	5	5	5	7	6	6	6	7	2	6	4	1	1	1				1						1			1	1		1
4	6	6	6	6	6	6	6	6	6	6	7	4	6	6	6	4	5	5	5	5	4	6	6	7	7	7	4	8	5	1	1	1	1			1
4	7	7	7	7	7	7	7	7	7	7	7	7	7	7	7	5	5	5	5	5	5	7	6	6	6	6	1	25	12	1	1	1	1			1						1	1	1
4	7	7	7	7	7	7	7	7	7	7	7	7	7	7	7	5	5	5	5	5	5	7	6	7	6	7	1	8	4
4	7	7	7	7	6	7	7	7	7	7	4	5	5	4	6	5	5	5	5	5	5	6	6	6	5	5	2	12	6	1	1	1												1				1	1
4	7	7	7	7	7	7	7	7	7	7	3	6	7	6	7	5	5	5	5	4	5	6	6	6	7	7	1	probably 6 to 8 times throughout the day	4 to 6 times about	1	1	1											1	1				1
4	6	7	5	6	6	7	7	6	7	7	6	4	6	6	5	5	5	5	5	4	5	7	6	6	7	7	2	around 10	probably around 6-7	1	1	1	1		1	1	1
5	7	7	7	7	7	7	7	7	7	7	6	4	7	7	6	5	5	5	5	5	5	6	6	5	7	7	2	8	2																	1
5	7	7	7	7	7	7	7	7	7	7	4	4	4	4	7	3	3	3	5	3	5	6	6	5	6	7	1	10	3							1
5	7	7	6	7	7	7	7	7	7	7	6	7	6	6	7	4	5	4	5	5	5	7	6	6	7	7	1	15	8	1	1	1	1	1	1	1							1
5	7	7	6	7	7	7	7	6	7	7	7	4	4	7	5	4	5	4	5	5	5	6	6	6	7	7	1	20	10		1	1				1						1
5	7	7	7	7	7	7	7	7	7	7	6	5	5	5	6	4	5	5	5	5	3	6	6	5	7	7	3	5	2		1					1	1
5	7	7	7	7	7	7	7	6	7	7	6	5	5	5	6	5	5	4	5	4	4	6	6	4	6	7	3	10+	2							1
5	6	5	5	6	6	6	5	4	6	6	5	5	6	5	6	4	5	4	5	5	4	7	5	1	6	4	2	5	5								1							1
5	6	5	6	7	6	6	5	6	7	6	5	5	4	5	6	3	3	4	5	2	4	6	4	6	7	6	2	3	3	1					1	1	1	1						1			1	1	1
5	6	6	6	6	6	7	7	7	7	6	7	7	7	7	6	4	5	5	5	2	5	7	6	6	6	7	1	25	15	1	1										1	1
5	7	7	7	7	6	7	7	7	7	7	6	6	7	7	6	5	5	5	5	5	5	6	6	7	7	7	3	8	3													1
5	6	6	6	6	6	6	6	6	6	6	3	4	3	2	6	3	5	4	5	3	4	6	6	5	7	7	2	3	2		1	1
5	7	5	7	7	5	7	7	7	7	6	6	4	7	6	6	5	5	5	5	5	5	7	6	6	7	6	1	10	6	1	1	1	1			1						1	1
5	6	5	6	7	5	6	5	6	7	5	5	5	6	6	3	4	4	4	4	4	4	7	6	6	7	7	3	10	8		1					1						1
5	6	6	6	7	7	7	7	6	7	7	7	6	6	6	6	5	5	5	5	5	5	7	6	6	6	7	5	8	5																			1
5	7	7	7	7	7	7	7	7	7	7	5	5	5	4	4	2	5	3	5	3	3	5	6	5	6	7	6	5	3
5	6	7	5	7	6	6	7	6	7	6	5	7	4	5	3	5	5	5	5	4	2	6	6	4	5	6	2	20	10	1						1	1
5	7	7	7	7	6	7	7	7	7	7	5	3	3	5	6	4	5	5	5	3	5	6	6	6	7	7	3	6	3							1	1				1	1
5	6	6	6	6	5	7	7	7	7	6	6	6	5	6	5	4	5	4	5	3	5	6	6	6	7	7	2	5	2		1	1				1
5	6	7	5	7	6	6	7	5	7	6	6	6	6	6	6	5	5	5	5	4	4	6	6	5	6	7	1	6	2		1					1
5	6	5	6	7	6	6	6	6	6	6	5	4	6	6	2	3	5	5	5	3	4	6	6	5	7	7	2	6-10	after the bathroom, 3-5			1
5	7	7	7	7	7	7	7	7	7	7	7	7	7	7	7	5	5	5	5	5	5	7	6	6	6	7	1	15	8	1	1					1	1				1	1
5	7	7	7	7	6	7	7	7	7	6	6	7	7	7	7	5	5	5	5	5	5	7	6	5	6	6	1	10	8	1	1					1	1
5	7	7	7	7	6	7	7	7	7	7	5	5	5	5	6	5	5	5	5	5	5	6	6	6	6	6	2	10	5												1	1
5	6	6	6	7	5	7	6	6	7	6	5	4	5	6	4	5	5	5	5	4	5	7	6	6	7	6	2	10	4	1	1	1			1	1						1
5	7	7	7	7	7	7	7	7	7	7	7	7	7	7	6	4	5	5	5	5	5	7	6	6	6	7	1	30	10								1
5	7	6	6	7	6	7	7	7	7	7	5	5	7	5	5	5	5	5	5	5	5	7	6	6	6	7	1	7	5	1		1	1			1						1	1					1
5	6	6	4	7	4	7	7	6	7	5	4	4	5	5	5	4	4	4	4	4	4	6	6	6	5	6	3	10	5		1
5	7	7	6	7	6	7	7	6	6	6	6	6	7	7	5	4	5	5	5	5	5	6	6	6	5	7	1	10	5				1						1	laundry detergent, Oxyclean				1	1
5	7	7	6	7	7	7	7	7	7	7	7	5	7	7	5	2	5	2	5	1	5	6	6	6	6	7	1	8	6
5	7	7	6	6	6	7	7	7	7	6	6	6	5	6	6	2	1	1	5	1	3	6	5	4	5	6	2	4	4							1		1						1			1
5	6	7	7	7	7	7	6	7	7	7	7	7	7	7	7	5	5	5	5	5	5	6	5	7	5	7	1	10	10							1
5	7	7	7	7	7	7	7	7	7	7	5	4	1	6	6	4	5	4	5	5	5	6	6	6	7	7	2	9	2		1	1									1		1
5	7	7	7	7	7	7	7	7	7	7	6	6	6	6	6	4	5	5	5	4	4	7	6	5	5	6	3	6-8	2-4	1	1	1	1		1	1
5	7	7	6	7	7	7	7	6	7	7	5	5	6	6	6	4	5	5	5	4	5	6	6	6	5	7	2	8	4		1		1			1						1
5	7	6	6	6	7	7	7	7	7	7	5	4	7	5	5	5	5	4	5	3	5	6	6	6	7	7	5	3	1			1	1									1
3	6	7	6	7	6	6	7	6	7	7	7	6	7	7	6	5	5	5	5	5	5	7	6	6	7	7	1	I don't know. I don't leave the house, so whatever a normal amount is? 15-20? I also have episodes of obsessively washing my hands.	15-20?		1					1			1	I had a lot of these items beforehand anyway. (hand sanitizer, bleach, vinegar)
5	4	2	3	3	4	6	2	2	2	4	1	1	1	1	2	2	2	2	2	1	4	1	4	1	5	6	1	1-2	1-2
5	7	5	6	7	5	7	5	6	7	7	7	4	7	7	5	5	5	5	5	4	4	7	7	7	7	7	2	0	10
1	6	6	5	6	5	7	7	6	7	6	6	4	7	7	5	4	5	5	5	4	4	7	6	6	7	5	1	6	6
5	6	6	6	7	6	7	7	7	7	7	7	4	7	7	6	3	5	5	5	4	4	6	6	5	6	7	1	10	6
1	7	7	6	7	7	7	6	5	7	7	5	4	2	4	2	2	4	2	5	2	4	5	4	1	7	6	2	2	0		1	1				1
2	7	7	7	7	7	7	7	7	7	7	5	6	7	5	7	5	5	5	5	5	5	7	7	6	6	7	1	6	4		1		1		1	1
2	6	6	6	6	5	6	6	6	6	5	5	5	6	5	5	4	5	5	5	5	3	4	7	7	5	7	3	3	2			1			1	1
4	6	6	6	6	7	6	6	6	6	6	5	4	5	6	6	3	4	4	5	4	2	5	5	4	5	6	2	7	5			1	1											1
5	6	6	6	6	6	7	7	7	7	7	2	5	6	3	5	5	5	5	5	5	5	7	6	6	6	6	1	12	7	1	1	1			1									1
2	6	6	6	6	6	7	7	6	7	7	4	5	5	5	5	4	5	5	5	3	5	4	7	5	7	7	3	5	3			1				1
4	6	5	5	7	5	7	7	5	7	7	6	7	7	7	7	5	5	5	5	4	3	5	6	5	7	7	1	10	3				1	1	1									1
5	5	7	5	7	5	7	7	7	7	7	7	4	7	7	6	2	5	5	5	2	4	5	6	4	7	7	5	5	0	1	1	1	1									1
1	6	7	7	6	6	7	7	7	7	7	6	6	7	7	6	5	4	5	5	5	5	7	6	6	5	7	2	4	3			1	1	1		1
2	6	7	7	7	5	6	7	6	7	5	6	4	7	7	5	5	5	5	5	5	5	7	6	6	5	7	1	12	4		1					1
2	7	7	7	7	7	7	7	7	7	7	7	7	7	7	7	5	5	5	5	5	5	7	6	6	5	7	1	20	5	1	1	1	1			1					1	1		1
3	7	7	6	7	6	6	7	6	6	6	4	4	5	6	5	4	5	4	5	5	4	6	6	6	5	7	2	15	8			1				1
3	7	7	7	6	6	7	7	7	7	6	1	6	6	6	6	4	4	5	5	5	5	6	6	5	6	7	2	5	4		1	1				1										1
3	7	7	7	7	7	7	7	5	6	7	7	6	6	5	5	5	4	4	4	4	5	7	5	4	7	7	7	4	4	1	1	1	1		1	1								1
5	7	7	7	7	7	7	7	7	7	7	5	6	5	5	5	5	5	5	5	5	5	6	6	6	6	6	1	4	2	1	1	1	1
1	7	6	7	7	7	7	7	7	7	7	6	6	6	6	7	5	5	5	5	5	5	6	6	6	7	7	2	10	7		1				1	1										1		1
2	6	6	5	6	6	6	5	5	7	6	3	4	3	6	4	3	5	5	5	3	3	6	6	6	7	6	2	15	15		1	1
2	6	6	5	6	6	7	6	6	6	6	6	6	6	6	5	4	5	5	5	5	5	7	6	7	6	6	2	8	5
3	7	6	6	7	7	7	6	6	7	7	7	6	7	7	7	5	5	5	5	5	4	7	6	6	7	6	1	15	10			1			1							1
3	7	6	6	6	4	7	7	7	6	4	5	4	5	6	6	4	5	5	5	3	2	6	6	5	6	5	6	9	4	1	1	1												1					1
3	7	7	7	7	7	7	7	7	7	7	1	4	7	7	7	5	5	5	5	5	5	7	7	7	7	7	1	10	10	1	1	1	1			1	1
3	7	7	7	7	7	7	7	7	7	7	7	5	7	7	7	5	5	5	5	5	5	6	6	5	7	6	5	10	2		1	1	1		1	1	1	1				1		1			1
4	7	7	7	7	7	7	7	7	7	7	5	4	6	5	6	5	4	4	5	5	4	7	6	6	7	6	2	10	7	1	1	1				1					1
4	7	7	7	7	7	7	7	7	7	7	7	6	7	7	7	4	5	5	5	5	5	7	6	6	5	7	1	20	10	1	1	1		1		1								1
4	7	7	7	7	7	7	7	7	7	7	4	4	6	5	4	5	5	5	5	5	5	7	6	6	7	7	1	10	8			1		1										1
5	7	5	5	7	5	7	7	7	7	7	6	6	7	7	7	5	5	5	5	5	5	6	6	5	6	7	2	20	5	1	1	1				1						1		1		1
5	6	7	6	7	5	6	7	6	7	5	6	4	6	7	5	4	5	5	5	2	4	6	6	6	5	5	1	12	10	1	1	1	1		1	1					1	1	1	1
1	7	7	7	7	7	7	7	7	7	7	7	7	7	7	7	5	5	5	5	5	5	6	7	6	7	7	1	15	10			1			1	1												1
1	7	7	7	7	7	7	7	7	7	7	7	7	7	7	6	5	5	5	5	5	5	6	7	6	7	7	1	10	5
1	6	6	6	6	6	6	6	6	6	6	2	2	2	2	3	2	4	2	5	5	5	6	6	4	5	7	2	10	6	1		1			1	1								1
2	7	7	7	7	7	7	7	7	7	7	6	6	6	6	6	5	5	5	5	5	5	7	6	6	6	7	1	20	15		1	1				1					1	1
2	7	7	7	7	7	7	5	7	7	7	7	7	7	7	7	5	5	5	5	5	5	7	5	7	5	7	1	15	10	1		1				1					1	1		1	1	1
3	7	7	6	7	5	7	7	7	7	5	6	4	7	6	5	5	5	5	5	5	5	6	6	5	7	5	2	5	2	1	1					1							1
3	7	7	7	7	7	7	7	7	7	7	6	6	6	6	7	5	5	5	5	5	5	7	6	6	7	7	1	10	5	1	1	1	1		1	1	1
2	6	6	6	5	5	6	5	5	6	5	5	6	6	6	3	2	5	5	5	3	3	6	5	4	6	5	5	10	5		1	1		1		1						1		1				1	1
2	7	7	7	7	7	7	7	7	7	7	7	7	7	7	7	4	5	5	5	4	4	7	7	7	7	7	1	6	4		1				1
2	7	7	7	7	7	7	7	7	7	7	7	7	7	7	7	5	5	5	5	5	5	6	7	6	6	7	1	6	2	1	1	1				1						1		1				1
2	7	7	7	7	6	7	7	7	7	7	5	6	7	6	7	5	5	5	5	5	5	7	6	7	7	7	1	10	7	1	1	1	1	1	1	1					1
3	7	7	7	7	7	7	7	7	7	7	7	6	7	7	7	4	5	5	5	5	4	6	6	6	7	6	1	6	4		1		1				1							1
3	6	6	7	7	6	7	6	7	7	7	7	6	7	7	7	5	4	4	5	3	5	6	6	6	5	7	2	10	5		1	1
4	7	6	5	6	6	7	6	5	6	6	3	4	4	5	6	3	5	5	5	5	5	7	6	6	5	5	1	40	40	1	1		1			1
4	7	7	7	7	7	7	7	7	7	7	5	4	7	7	6	2	5	5	5	5	5	7	6	6	6	7	1	11	7	1	1	1	1		1	1					1	1				1
5	7	7	7	7	6	7	7	7	7	6	7	6	7	7	6	5	5	5	5	4	5	6	6	6	6	7	1	10	5							1	1
3	7	7	7	7	6	7	7	7	7	7	6	4	6	6	6	4	5	4	5	5	4	6	6	6	7	7	2	2	8
2	7	6	7	7	7	7	7	7	7	7	7	4	5	7	6	5	5	5	5	4	5	7	6	6	5	7	2	6	4
1	6	6	6	6	5	6	7	6	7	6	4	4	6	5	4	5	5	5	5	5	5	6	6	6	6	6	2	6 or more	6	1			1
5	7	7	7	7	7	7	7	7	7	7	5	7	7	6	7	5	5	5	5	5	5	7	6	7	7	7	1	20	20	1	1					1
2	7	7	5	6	5	7	7	6	7	5	7	4	2	7	6	5	5	5	5	4	4	6	6	6	7	7	1	5-7	3-4	1	1					1	1
2	7	7	6	7	6	7	7	6	7	6	5	3	4	5	5	2	5	5	5	3	5	6	6	6	7	7	4	4	2			1				1
2	7	7	6	7	6	6	7	5	7	6	5	4	7	6	5	4	5	3	5	5	4	6	7	6	7	7	1	8	4	1	1	1				1	1
5	7	7	7	7	7	7	7	7	7	7	7	4	7	7	7	4	5	4	4	4	5	7	6	6	7	7	2	5	3		1		1	1		1								1
1	7	7	7	7	7	7	7	7	7	7	7	6	6	7	7	5	5	5	5	5	3	6	6	6	5	7	2	10	5		1	1									1	1	1
1	7	7	7	7	7	7	7	7	7	7	2	4	4	2	5	4	5	5	5	4	3	6	7	7	7	7	2	5	5							1								1
1	7	7	7	7	6	7	7	7	7	7	5	7	2	7	3	5	5	5	5	5	5	6	7	5	7	7	4	7	3							1
1	7	7	6	7	7	7	7	7	7	7	2	6	6	5	6	2	5	4	5	5	4	6	6	6	6	7	2	15	6	1	1	1	1			1						1		1
1	6	7	6	7	6	7	7	7	7	7	6	3	4	6	5	3	5	5	5	2	4	7	4	5	6	7	5	8	3		1	1	1									1
1	7	7	6	7	5	7	7	7	7	6	4	4	4	4	5	2	4		5	5	4	7	6	5	7	7	2	6	3		1	1
1	6	7	7	5	7	6	7	5	7	6	2	2	4	3	6	4	5	3	5	3	4	6	6	6	6	7	2	6	2	1		1				1					1		1
1	6	7	6	7	6	7	7	6	7	7	5	3	6	6	5	4	4	5	5	4	3	6	6	5	6	7	2	30	25			1				1										1
1	6	7	6	4	2	6	5	4	3	4	4	3	4	6	4	4	3	2	3	4	3	6	7	5	6	4	6	10	4		1		1			1									1		1
1	6	7	6	6	3	6	6	6	7	3	2	2	5	5	4	3	4	5	3	4	3	6	6	6	5	4	3	10	7	1						1
1	7	7	6	7	7	7	7	5	7	7	6	4	4	7	7	5	5	5	5	5	4	6	6	5	6	7	1	8	4		1	1	1	1		1					1	1		1
1	7	7	7	7	7	7	7	7	7	7	7	7	7	7	7	5	5	5	5	5	5	7	6	6	6	7	1	10	5			1
1	7	7	6	7	4	7	7	7	7	4	5	5	4	5	6	5	5	5	5	4	5	6	6	6	6	4	2	10	4	1	1	1	1			1					1
2	7	7	6	7	6	7	7	7	7	7	7	5	7	7	7	5	5	5	5	5	5	6	6	6	7	7	2	8	3		1	1	1			1					1	1
2	6	6	6	6	6	6	6	6	6	6	5	4	6	6	6	2	4	2	5	4	1	1	5	6	5	1	2	3	3
2	7	7	7	7	7	7	7	7	7	7	6	6	7	7	7	5	5	5	5	5	5	7	6	6	7	6	1	6	2		1	1	1			1
2	7	7	7	7	7	7	7	7	7	7	6	6	6	4	5	5	5	5	5	5	5	6	7	7	7	6	1	5	1		1	1		1														1
2	7	7	7	7	7	7	7	7	7	7	5	5	5	5	5	4	5	4	5	5	5	6	6	6	7	7	2	15	10		1	1	1			1							1	1
2	7	7	7	7	7	7	7	7	7	7	6	6	6	6	6	4	5	5	5	4	5	7	6	6	7	7	2	10	4		1	1	1			1					1			1
3	5	6	5	6	6	6	6	5	7	6	5	4	6	5	4	2	4	3	5	5	3	7	6	4	7	7	2	10	6		1														1
3	5	5	5	2	5	6	6	6	7	5	5	3	5	6	3	2	5	3	5	2	3	6	6	6	6	6	1	5	3															1
3	6	6	6	6	6	6	6	6	6	6	4	6	4	5	4	5	4	5	4	5	4	4	6	6	6	5	3	25	20		1	1		1									1	1		1
3	6	7	6	7	5	6	7	6	7	5	5	5	5	6	5	3	4	3	4	4	3	6	6	6	6	7	2	5	3	1					1	1					1	1
4	7	7	7	7	7	7	7	7	7	7	6	6	5	6	6	5	5	5	5	5	4	6	6	6	6	6	2	6	2
4	7	7	7	7	7	7	7	7	7	7	6	6	7	7	7	4	4	4	4	4	4	6	6	5	5	7	2	10	3
4	7	7	7	4	6	7	7	7	7	7	5	6	6	4	6	5	5	5	5	4	3	6	6	6	6	7	4	10	4							1					1
4	7	7	7	7	7	7	7	7	7	7	7	7	5	6	7	5	5	3	5	4	5	7	6	7	6	7	1	5	4	1		1	1		1	1	1
4	6	6	6	7	4	7	7	6	7	4	4	7	4	4	7	5	5	5	5	5	4	6	6	5	7	7	1	10	5	1		1	1			1	1				1	1		1
4	6	6	6	6	5	6	7	5	6	5	5	5	6	5	6	2	5	4	4	2	2	5	6	5	7	7	2	7	5			1
4	6	5	5	6	7	7	5	6	6	7	5	6	5	6	5	3	4	5	4	5	4	7	5	5	5	6	1	8	5		1	1				1								1
5	5	6	6	7	6	6	7	7	7	7	6	4	6	7	6	4	4	4	5	5	5	6	6	6	7	7	2	5	7		1	1
5	7	7	5	7	7	7	6	7	7	7	5	4	6	7	6	4	5	4	5	5	5	7	6	5	6	7	2	10	10		1	1				1
5	7	7	7	7	7	7	7	7	7	7	5	4	7	6	6	4	5	5	5	5	5	7	6	6	6	7	2	20	3-5	1	1	1	1	1	1	1						1		1
5	6	6	6	7	7	6	6	6	7	7	5	5	6	7	5	5	5	4	5	5	5	7	6	6	7	7	2	10	8			1									1
1	6	6	6	6	6	6	6	6	7	6	4	3	5	5	3	3	3	2	4	3	4	6	6	5	6	6	3	10	4
1	5	5	5	5	5	7	7	7	7	7	7	7	7	7	7	5	5	5	5	5	5	6	6	7	7	6	1	10	8		1	1	1		1											1
1	7	7	6	7	7	7	7	6	7	7	5	6	7	5	7	5	5	5	5	5	5	6	5	6	7	6	1	7-10	4-6							1			1	Antibacterial dish soap	1
2	7	7	6	7	6	7	7	6	7	6	5	7	7	5	7	5	5	5	5	4	4	6	6	6	6	6	1	6	4			1				1					1	1		1		1
2	7	7	7	7	7	7	7	7	7	7	7	6	7	7	7	5	5	5	5	5	5	7	6	6	6		1	15	10	1	1	1	1	1	1	1	1							1
2	7	7	7	7	7	7	7	7	7	7	4	4	4	3	6	4	5	5	5	5	5	6	6	6	5	6	2	8	5		1					1	1				1	1
3	7	6	7	7	6	7	6	7	7	7	7	4	6	7	5	5	5	5	5	5	4	7	6	6	5	7	1	15	15		1	1	1	1	1	1							1
3	6	7	7	7	6	7	7	6	7	7	2	6	3	1	5	5	5	5	5	3	5	6	6	5	5	7	2	4	2		1	1	1			1								1
3	7	6	6	7	6	7	7	7	7	7	7	4	6	7	7	4	5	5	5	5	4	6	6	6	7	7	1	8	6		1												1
3	7	7	7	7	7	7	7	7	7	7	5	4	4	6	6	3	5	4	4	2	4	6	6	5	7	6	4	6	4			1		1							1			1				1
3	7	7	7	7	7	7	7	7	7	7	4	3	5	3	7	1	5	5	4	4	5	6	6	5	6	7	4	3	2
4	6	7	5	7	5	6	7	5	7	7	5	4	4	6	4	4	5	5	5	5	4	6	6	6	6	7	2	20	15		1	1	1	1		1					1
4	6	6	5	7	6	6	6	6	7	6	5	4	7	5	4	5	5	4	5	4	5	6	6	5	6	7	4	6	4	1	1	1			1	1									1
4	7	7	7	7	5	7	7	7	7	6	6	6	7	7	7	5	5	5	5	5	5	6	6	6	6	5	4	8	4			1	1											1
4	7	7	7	7	7	7	7	7	7	7	5	4	6	5	7	5	5	5	5	4	3	6	6	7	7	7	2	6	3			1	1								1
5	5	5	5	5	5	6	5	5	5	5	6	4	6	6	5	5	5	5	5	4	4	7	6	7	5	5	2	5	3	1	1	1	1	1	1	1								1		1
5	6	7	6	7	6	6	7	6	7	6	4	4	5	4	6	4	4	4	5	3	4	6	6	5	7	7	2	5	3		1	1	1											1
5	6	7	6	7	6	7	7	6	7	6	2	6	3	2	2	5	5	5	5	5	5	7	6	6	7	7	2	4	5	1	1	1	1	1	1	1
5	7	6	6	7	6	7	6	6	7	6	6	5	7	6	6	2	5	3	5	4	2	6	6	4	7	7	3	15	12	1	1	1				1						1		1
5	6	6	6	6	6	6	6	6	6	6	6	4	5	6	4	4	5	5	5	3	4	7	6	6	7	7	2	20	10		1	1				1
	7	7	7	7	5	7	7	7	7	7	3	4	6	7	5	4	4	4	2	4	3	5	6	6	5	7	1	About 10-15 times a day, which is a lot more than I used to before the coronavirus pandemic. The number of times I wash my hands in a day depends on the frequency of using the restroom, if I've used public transportation, if I've touched items that are in public areas (e.g., while grocery shopping), been a seemingly unhygienic area, and if I've been in close contact with someone from outside my h…	About 5-7 times a day. In comparison to the previous answer, I opted out of washing my hands when I was out in public and in close contact with other people.
4	7	7	7	7	6	7	7	7	7	7	4	4	6	5	5	5	5	5	5	5	5	7	6	6	7	7	1	10-15	5-6			1
5	6	6	6	6	6	6	6	6	6	6	4	4	4	5	4	3	5	5	5	3	4	6	6	5	7	6	2	5	2			1
3	7	7	7	7	6	7	7	7	7	6	7	4	6	7	6	5	5	5	5	5	4	7	6	7	7	7	1	Around 10-15 times	10			1	1			1			1	Gloves and masks	1			1
3	5	4	4	5	4	6	4	5	4	5	5	5	4	4	5	3	3	3	3	3	4	5	5	5	6	6	4	2	2
[truncated: 68 more columns]
